# Supplementary material for: Synechococcus elongatus PCC7942 secretes extracellular vesicles to accelerate cutaneous wound healing by promoting angiogenesis
Source: PubMed Central journal article supplement — Theranostics. 2019 Apr 13;9(9):2678–93. doi: 10.7150/thno.31884 (PMC6525994; doi:10.7150/thno.31884), 2019-04-13
Supplement: thnov09p2678s1.pdf [file thnov09p2678s1.pdf]

## Supplementary Material

### *Synechococcus elongatus* PCC7942 secretes extracellular vesicles to accelerate cutaneous wound healing by promoting angiogenesis

Hao Yin<sup>1,2\*</sup>, Chun-Yuan Chen<sup>1,2\*</sup>, Yi-Wei Liu<sup>2,3\*</sup>, Yi-Juan Tan<sup>2</sup>, Zhi-Li Deng<sup>4,7</sup>, Fei Yang<sup>6</sup>, Fei-Yu Huang<sup>6</sup>, Cong Wen<sup>6</sup>, Shan-Shan Rao<sup>2,8</sup>, Ming-Jie Luo<sup>2,8</sup>, Xiong-Ke Hu<sup>2</sup>, Zheng-Zhao Liu<sup>2,4</sup>, Zhen-Xing Wang<sup>2</sup>, Jia Cao<sup>2</sup>, Hao-Ming Liu<sup>2</sup>, Jiang-Hua Liu<sup>1,2</sup>, Tao Yue<sup>1,2</sup>, Si-Yuan Tang<sup>8</sup>, Hui Xie<sup>1-5#</sup>

1. Department of Orthopedics, Xiangya Hospital, Central South University, Changsha, Hunan 410008, China.
2. Movement System Injury and Repair Research Center, Xiangya Hospital, Central South University, Changsha, Hunan 410008, China.
3. Department of Sports Medicine, Xiangya Hospital, Central South University, Changsha, Hunan 410008, China.
4. Hunan Key Laboratory of Organ Injury, Aging and Regenerative Medicine, Changsha, Hunan 410008, China.
5. Hunan Key Laboratory of Bone Joint Degeneration and Injury, Changsha, Hunan 410008, China.
6. Department of Occupational and Environmental Health, Xiangya School of Public Health, Central South University, Changsha, Hunan 410078, China
7. Department of Dermatology, Xiangya Hospital, Central South University, Changsha, Hunan 410008, China.
8. Xiangya Nursing School, Central South University, Changsha, Hunan 410013, China

\*These authors contributed equally to this work.

#Corresponding author: [huixie@csu.edu.cn](mailto:huixie@csu.edu.cn); #87 Xiangya road, Changsha, Hunan 410008, China.

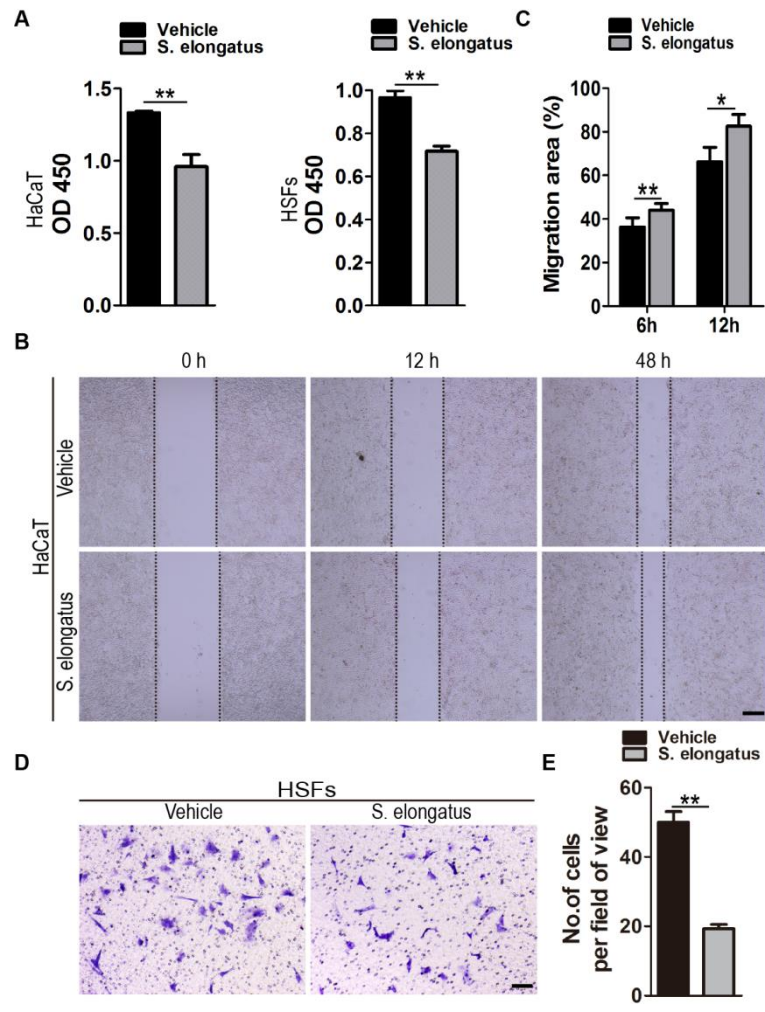

**Figure S1. Effects of *S. elongatus* PCC 7942 on functional properties of keratinocytes and fibroblasts.** (A) CCK-8 analysis of proliferation of human keratinocyte cell line HaCaT and human skin fibroblasts (HSFs). n = 4 per group. (B-C) Representative images of wound healing assay in HaCaT (B) and quantitative analysis of the migration rates (C). Scale bar: 200  $\mu$ m. n = 3 per group. (D-E) Representative images of transwell migration assay in HSFs (D) and quantitative analysis of the migrated cells (E). Scale bar: 100  $\mu$ m. n = 3 per group. Data are plotted as mean  $\pm$  SD. \*  $P < 0.05$ , \*\*  $P < 0.01$ , \*\*\*  $P < 0.001$ .

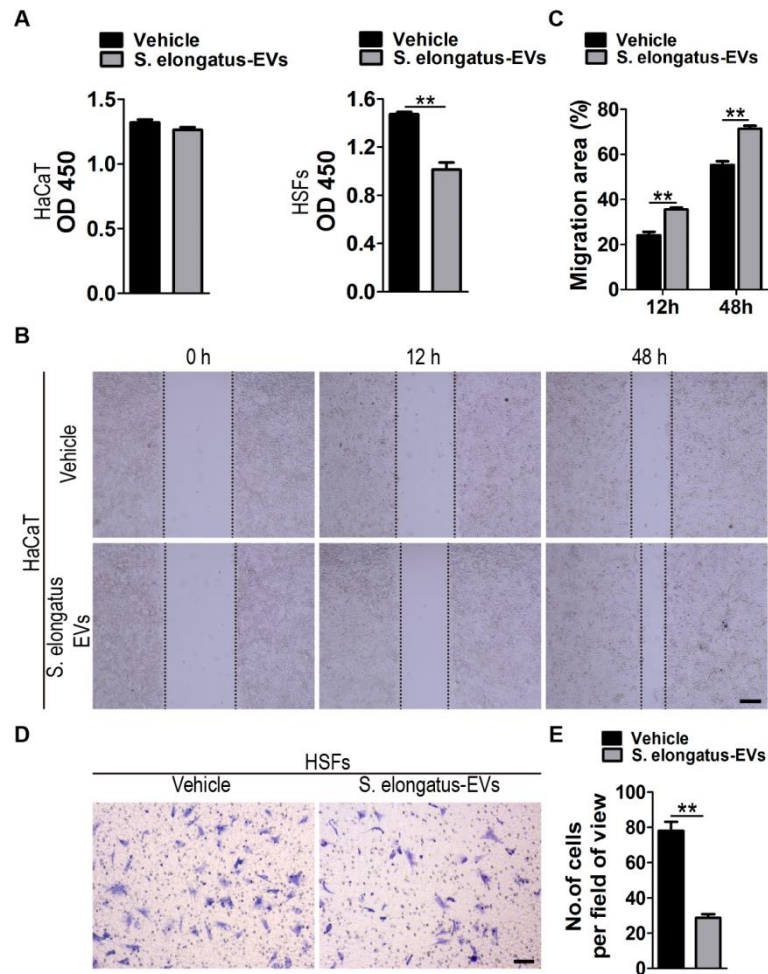

**Figure S2. Effects of *S. elongatus*-EVs on functional properties of human keratinocytes and fibroblasts.** (A) CCK-8 analysis of proliferation of keratinocyte cell line HaCaT and HSFs.  $n = 4$  per group. (B-C) Representative images (B) and quantification (C) of wound healing assay for HaCaT. Scale bar: 200  $\mu\text{m}$ .  $n = 3$  per group. (D-E) Representative images (D) and quantification (E) of wound healing assay for HSFs. Scale bar: 200  $\mu\text{m}$ .  $n = 3$  per group. Data are plotted as mean  $\pm$  SD. \* $P < 0.05$ , \*\* $P < 0.01$ , \*\*\* $P < 0.001$ .

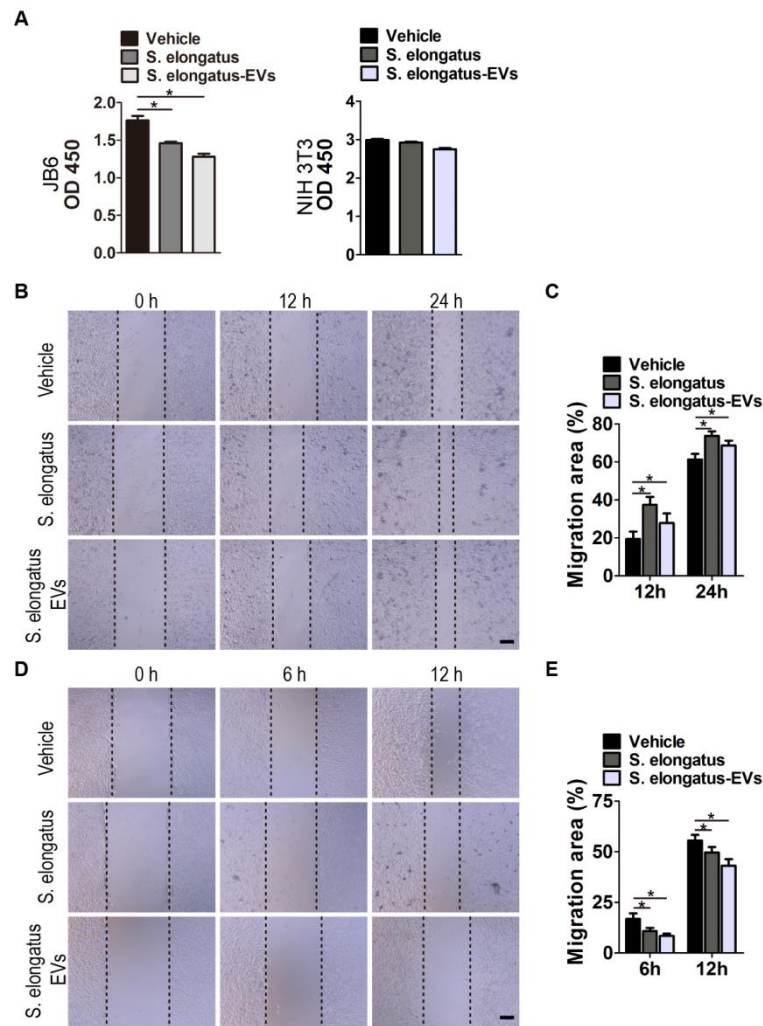

**Figure S3. Effects of *S. elongatus* PCC 7942 and *S. elongatus*-EVs on functional properties of mouse epidermal cells and fibroblasts. (A) CCK-8 analysis of proliferation of mouse epidermal JB6 cells and NIH3T3 fibroblasts.  $n = 4$  per group. (B-C) Representative images (B) and quantification (C) of wound healing assay for JB6 cells. Scale bar: 200  $\mu\text{m}$ .  $n = 3$  per group. (D-E) Representative images (D) and quantification (E) of wound healing assay for NIH3T3 fibroblasts. Scale bar: 200  $\mu\text{m}$ .  $n = 3$  per group. Data are plotted as mean  $\pm$  SD. \*  $P < 0.05$ , \*\*  $P < 0.01$ , \*\*\*  $P < 0.001$ .**

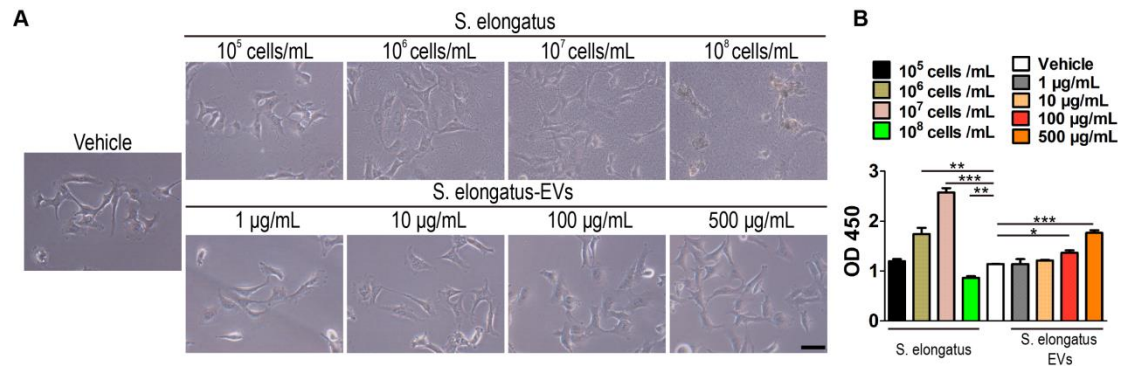

**Figure S4. Effects of *S. elongatus* PCC 7942 and *S. elongatus*-EVs on morphology and growth of endothelial cells.** (A) Morphology of HMECs under optical microscopy. Scale bar: 100 µm. (B) CCK-8 analysis of HMECs' viability. n = 4 per group. Data are plotted as mean ± SD. \*  $P < 0.05$ , \*\*  $P < 0.01$ , \*\*\*  $P < 0.001$ .
